# Supplementary material for: The Study of Derivatization Prior MALDI MSI Analysis—Charge Tagging Based on the Cholesterol and Betaine Aldehyde
Source: MDPI journal article supplement (doi:10.3390/molecules26092737), 2021-05-06
Supplement: s1 [file s1]

# The study of derivatization prior mass spectrometry imaging (MSI) analysis – charge tagging based on the cholesterol and betaine aldehyde

Przemyslaw Mielczarek <sup>1</sup>, Tymoteusz Slowik <sup>2</sup>, Jolanta Helena Kotlinska <sup>3</sup>, Piotr Suder <sup>4</sup>, Anna Bodzon-Kulakowska <sup>4,\*</sup>

1 Laboratory of Proteomics and Mass Spectrometry, Maj Institute of Pharmacology, Polish Academy of Sciences, Smetna 12 st., 31-343 Krakow, Poland

2 Experimental Medicine Center, Medical University of Lublin, Jaczewskiego 8D st., 20-090 Lublin, Poland

3 Department of Pharmacology and Pharmacodynamics, Medical University of Lublin, Chodzki 4a st., Medical University, 20-093 Lublin, Poland

4 Department of Analytical Chemistry and Biochemistry, Faculty of Materials Science and Ceramics, AGH University of Science and Technology, A. Mickiewicza 30 ave., 30-059 Krakow, Poland

\* Correspondence: abk@agh.edu.pl; Tel.: +48 12 6175083

## Supplementary materials:

### • Polystyrene lid – sample preparation

The way of dealing with different ways of sample preparation on a single glass during the optimization of the MSI tissue measurements:

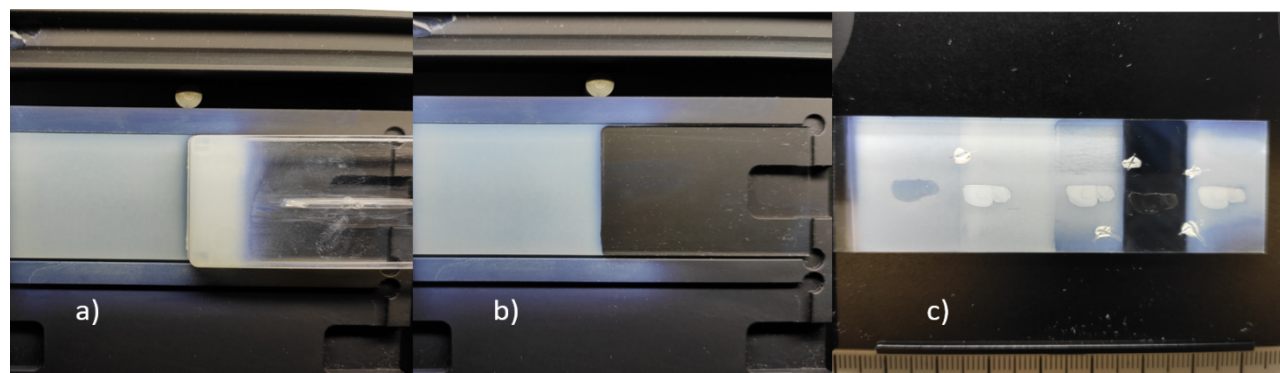

**Figure S1.** (a) ITO glass slide partially covered with polystyrene lid during matrix deposition (semi-transparent lid visible on the right); (b) sharp edges of matrix obtaining after lid removal; (c) regions of ITO glass slide with different matrix and derivatizing strategy.

### • Nissl staining

Histological Nissl staining of the tissue sections after MALDI measurements were proceed as follows:

1. 5 minutes washes in 96% ethanol,
2. 5 minutes washes in 96% ethanol,
3. Drying for 5 min in desiccator,
4. Immersion in the water for 1 minute,
5. Cresyl violet stain\* - 15 minutes
6. Dipping in water to remove cresyl violet solution (Sigma-Aldrich)
7. 30 second 50% ethanol
8. 30 second 95% ethanol
9. 30 second Histochoice Clearing Agent (Sigma-Aldrich)
10. Mounting tissue section with DPX mountant for histology (Sigma-Aldrich)
11. Obtaining a picture of tissue section

\*Cresyl violet stain: 1.25g cresyl violet acetate and 0.75 ml glacial acetic acid to 250 ml warm H<sub>2</sub>O, cool and filter

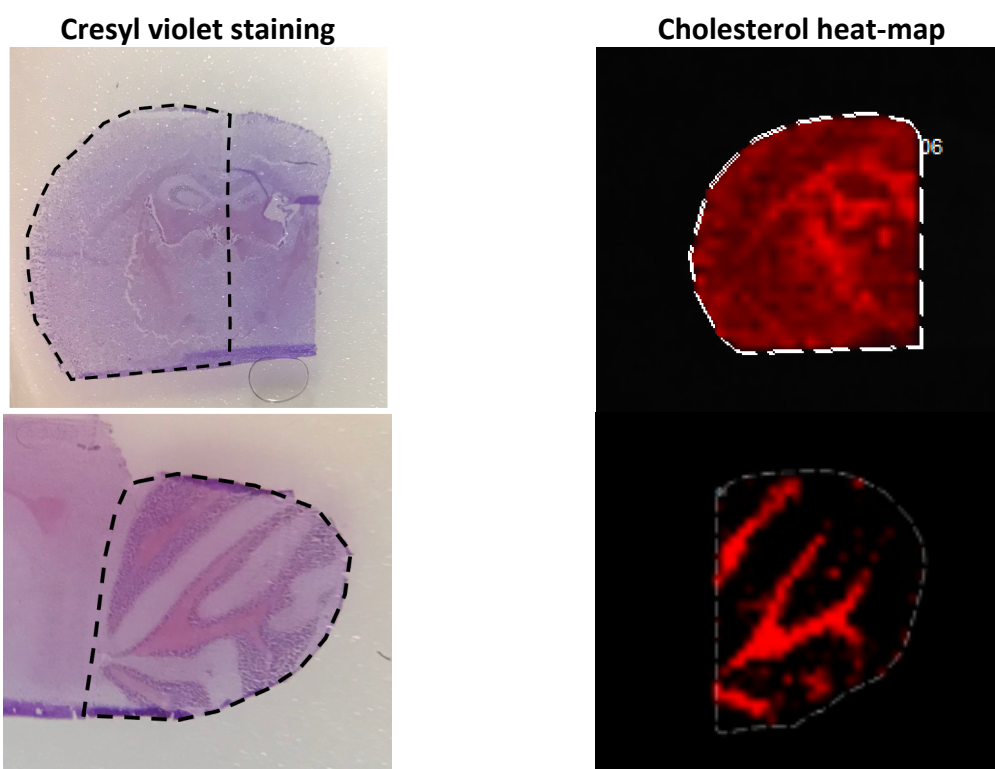

**Figure S2.** Exemplary tissue sections stained with cresyl violet, with the heat-map of cholesterol distribution.

- The number of betaine aldehyde layers – cholesterol derivatization

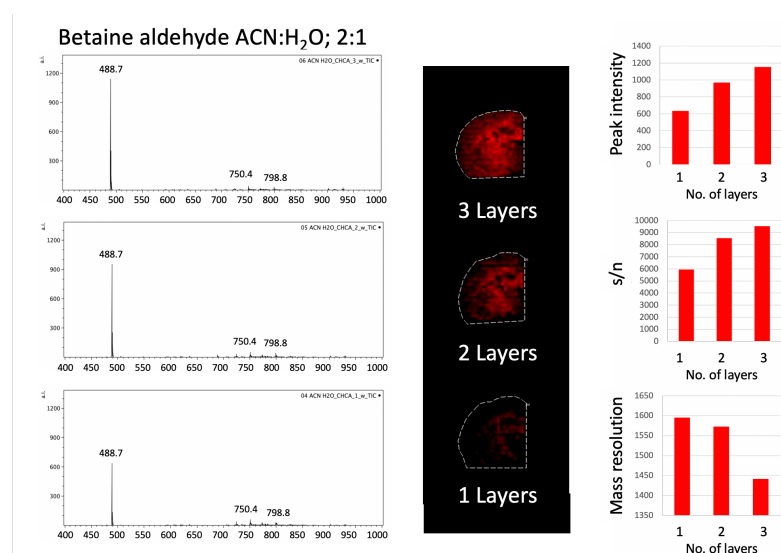

**Figure S3.** A slight saturation of the signal's response with the increasing number of layers could be observed when we consider the signal intensity from derivatized cholesterol from the whole tissue area.
